# Supplementary material
Source: publisher site journal article supplement (https://www.spandidos-publications.com/4838/downloadSupplementary)

Figure S1. Location and frequency of *RNF43* mutations in UCAN and sporadic CRC. CRC, colorectal cancer; fs, frame shift; RNF43, ring finger protein 43; UCAN, ulcerative colitis-associated neoplasia.

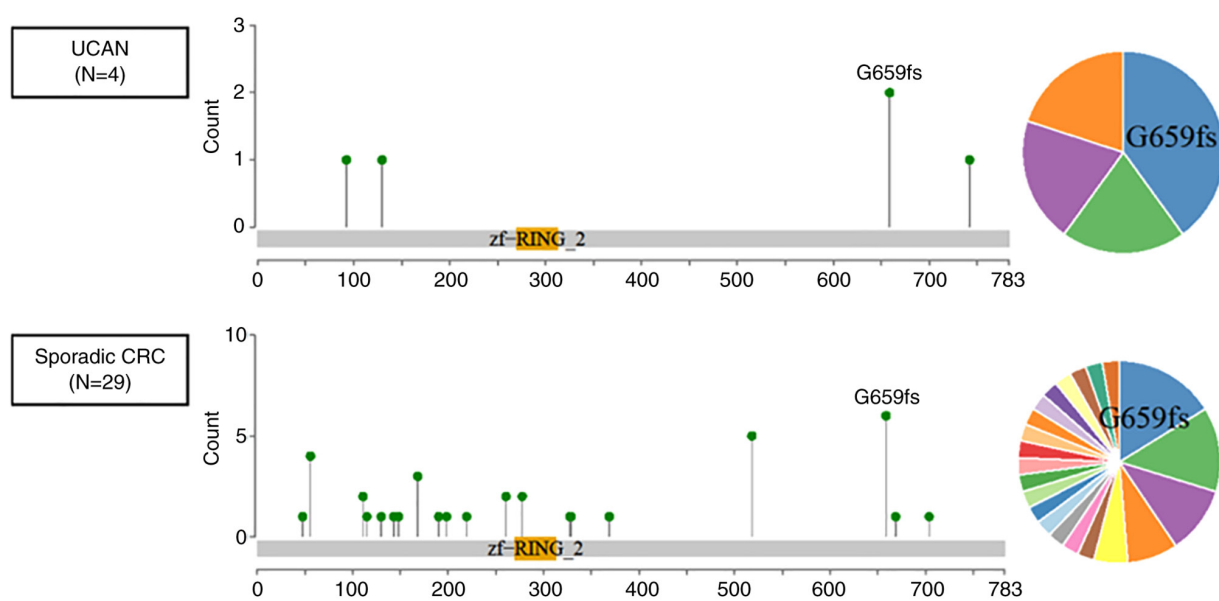

Figure S2. Oncoprint of patients with *RNF43* mutations in UCAN and sporadic CRC. CRC, colorectal cancer; fs, frame shift; MSI-H, microsatellite instability-high; MSS, microsatellite stable; *RNF43*, ring finger protein 43; UCAN, ulcerative colitis-associated neoplasia; X, stop codon.

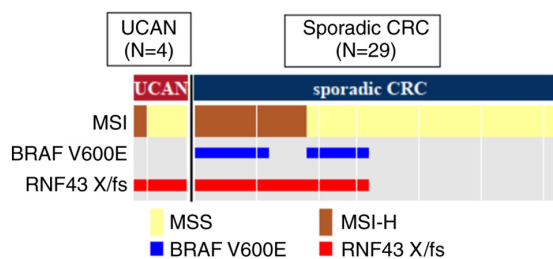

Figure S3. Location and frequency of *TP53* mutations in UCAN and sporadic CRC. CRC, colorectal cancer; UCAN, ulcerative colitis-associated neoplasia.

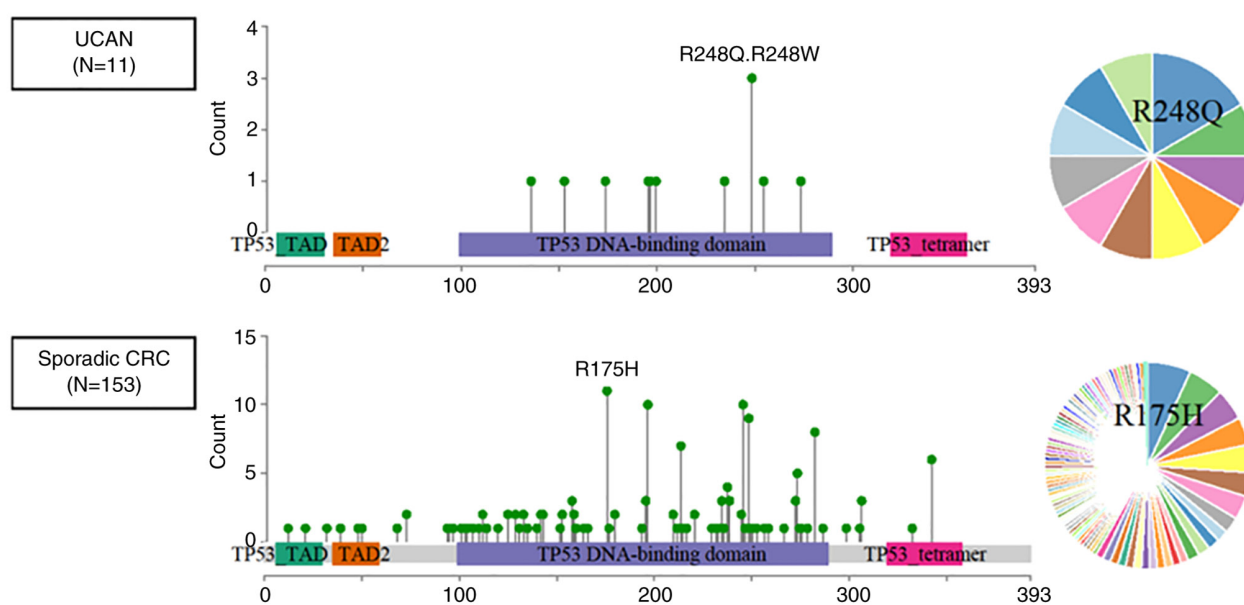

Figure S4. Patients with *TP53* mutation alone in UCAN and sporadic CRC. CRC, colorectal cancer; UCAN, ulcerative colitis-associated neoplasia.

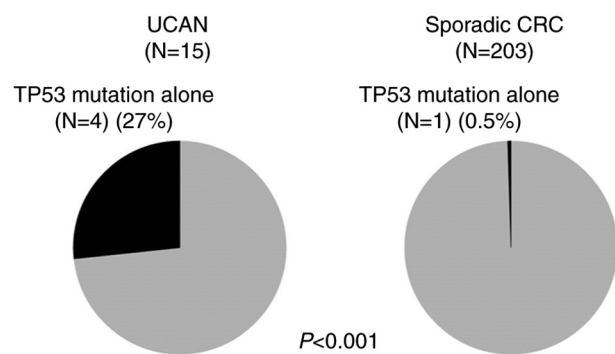

Figure S5. Mutational signature ratio of 15 patients with UCAN and 203 patients with sporadic CRC. CRC, colorectal cancer; NA, not applicable; Sig, signature; UCAN, ulcerative colitis-associated neoplasia.

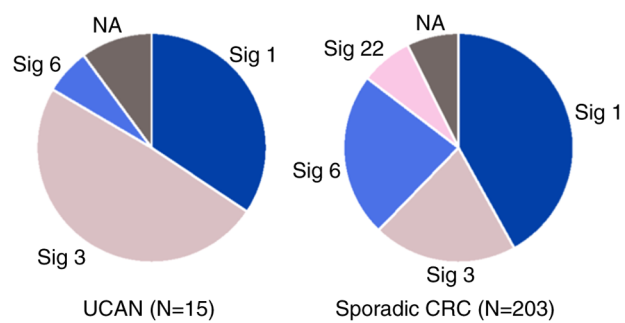

Figure S6. Mutational signature distributions of patients with MSI-H with UCAN and sporadic CRC. CRC, colorectal cancer; MSI-H, microsatellite instability-high; sCRC, sporadic colorectal cancer; TMB, tumor mutational burden; UCAN, ulcerative colitis-associated neoplasia.

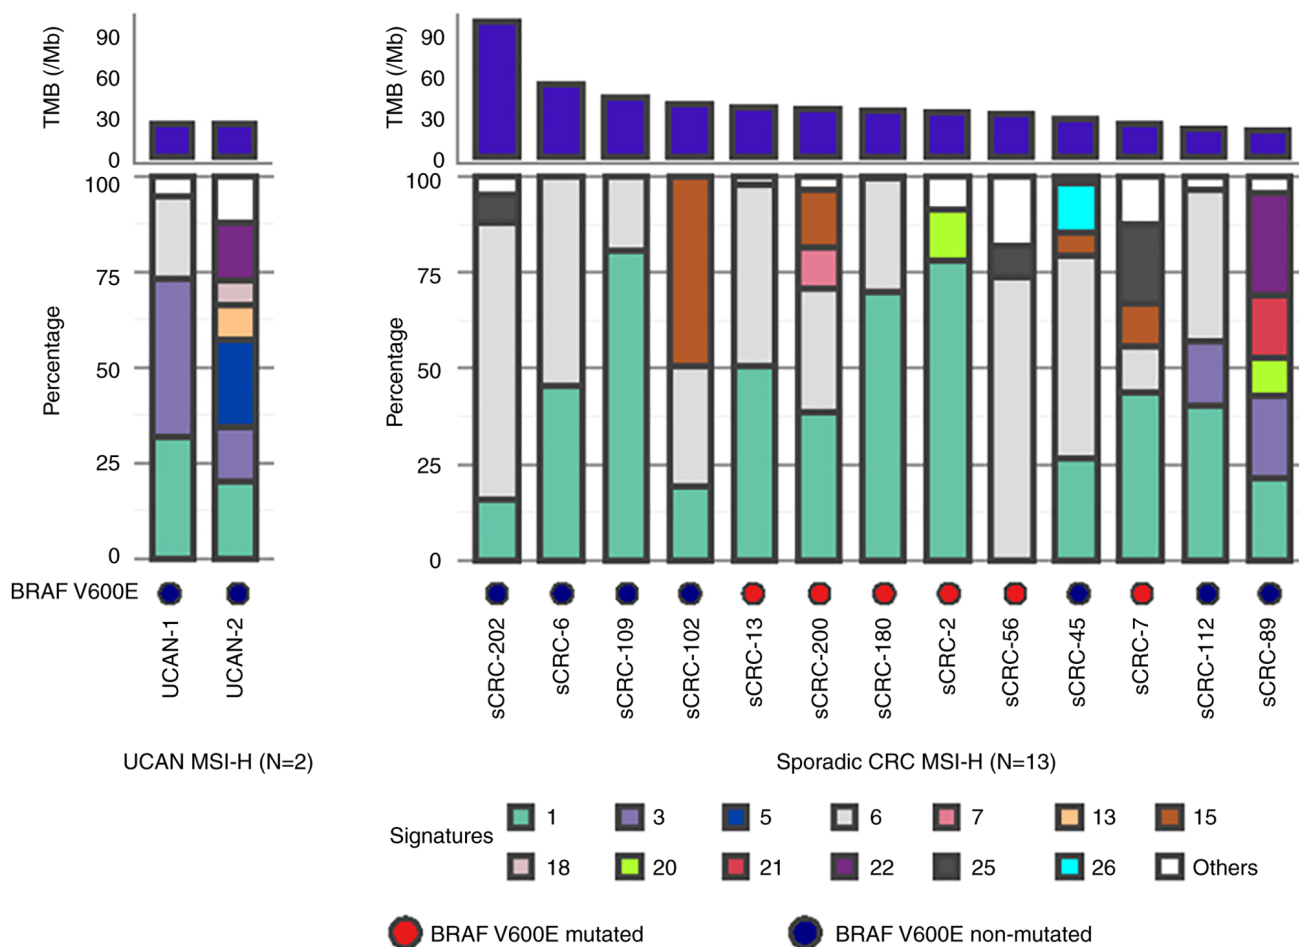

Supplement: Supplementary file 1 [file downloadSupplementary]
